# Supplementary material
Source: Springer Nature journal article supplement (https://www.springermedizin.de/resource/supplementary/13256_2009_1878_MOESM5_ESM.pdf/9648650)

048Y  
F

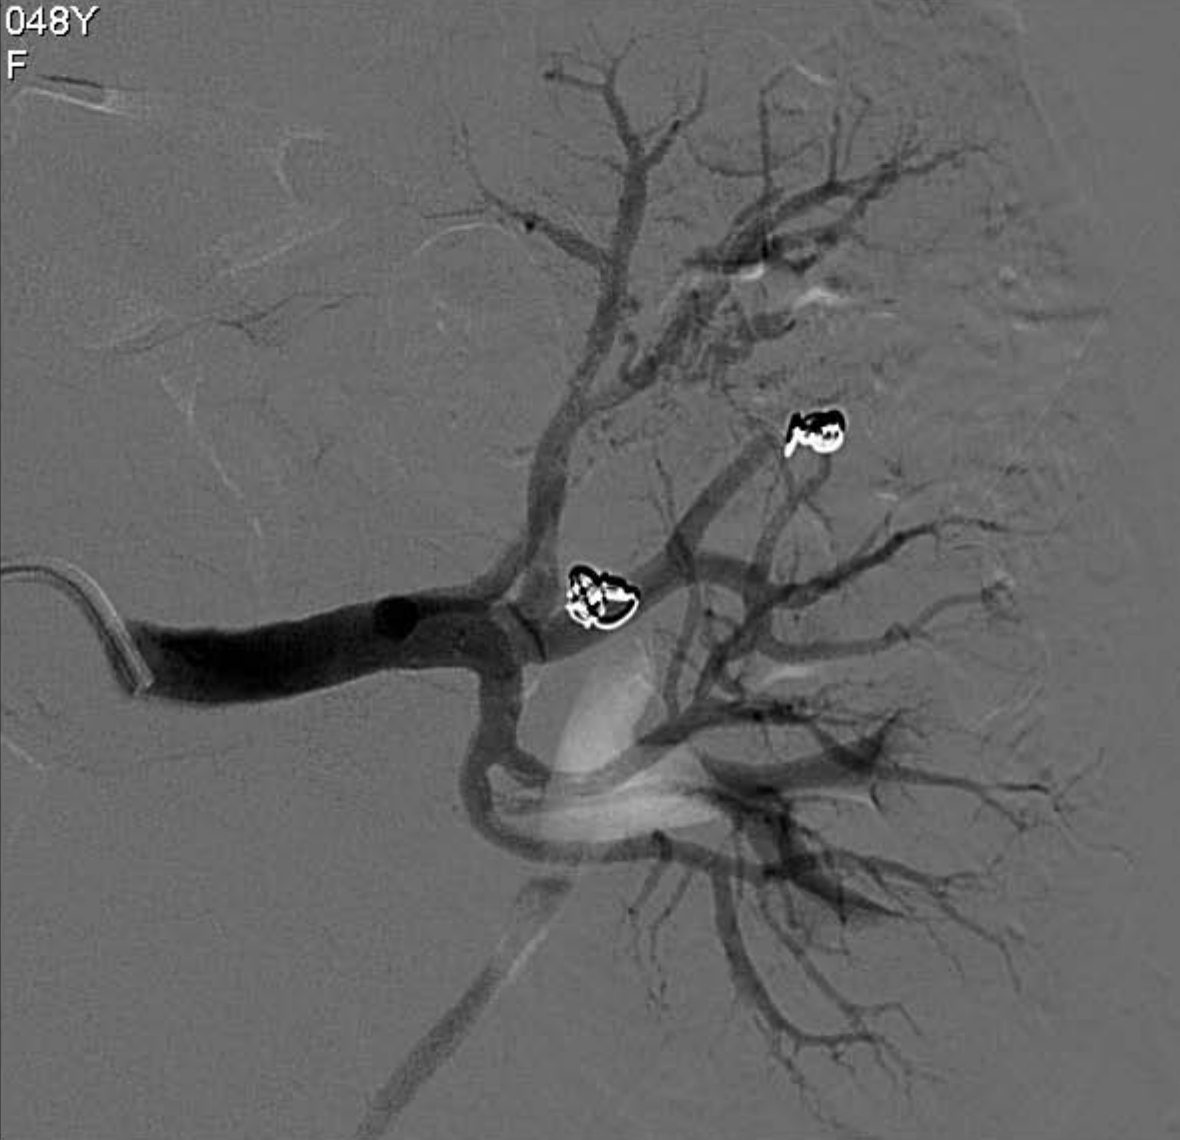

Supplement: MOESM5 [file 9648650]
